# Supplementary material
Source: PubMed Central journal article supplement (PMC3107680)
Supplement: NIHMS296069-supplement-supplement_1.pdf [file NIHMS296069-supplement-supplement_1.pdf]

Supplemental table: Plasma lipid levels of C57BL/6 and L1 mice fed a chow, SAT or n-3 diet.

|                 | C57 BL/6   |              |              | L1           |               |             |
|-----------------|------------|--------------|--------------|--------------|---------------|-------------|
|                 | Chow       | SAT          | n-3          | Chow         | SAT           | n-3         |
| Body weight (g) | 23.39±1.00 | 26.70±0.86   | 24.12±0.90   | 31.5±0.88    | 33.56±0.53    | 34.3±1.78   |
| FFA (mM)        | 0.42±0.26  | 0.82±0.20    | 0.25±0.10    | 0.73±0.15    | 1.04±0.10     | 0.60±0.07   |
| T-Chol (mg/dl)  | 67.52±3.06 | 102.24±11.10 | 111.78±11.24 | 78.36±11.91  | 146±20.95     | 77.50±34.68 |
| TG (mg/dl)      | 56.65±5.84 | 130.96±6.97  | 21.39±4.68   | 196.06±65.11 | 351.77±119.41 | 76.51±63.05 |

Four-week-old mice fed chow, SAT or n-3 diets for 12 weeks (n>10). Mouse body weight was measured and blood samples were collected and determined for free fatty acids (FFA), total cholesterol (T-Chol) and triglyceride (TG) levels as described in Methods. The results are expressed as the mean±SD. Values shown for C57BL/6 mice were previously reported in reference 6.
